# Supplementary material for: Determination of [Glu1]-fibrinopeptide B purity by gas chromatography – isotope dilution mass spectrometry
Source: Royal Society of Chemistry journal article supplement (doi:10.1039/d3ay02114a), 2024-01-01
Supplement: d3ay02114a1.pdf [file d3ay02114a1.pdf]

## Supplementary Information

**Table S1 Composition of amino acid mixture solution CRM**

| Amino acids          | Certified Value (mmol/L) | Uncertainty (mmol/L) , $k=2$ |
|----------------------|--------------------------|------------------------------|
| Aspartate            | 0.991                    | 0.03                         |
| Threonine            | 0.991                    | 0.03                         |
| Serine               | 0.994                    | 0.03                         |
| Glutamate            | 0.982                    | 0.03                         |
| Glycine              | 0.988                    | 0.03                         |
| Alanine              | 0.993                    | 0.03                         |
| Cystine              | 0.991                    | 0.04                         |
| Valine               | 0.993                    | 0.04                         |
| Methionine           | 0.999                    | 0.03                         |
| Isoleucine           | 0.997                    | 0.02                         |
| Leucine              | 0.991                    | 0.04                         |
| Tyrosine             | 0.994                    | 0.03                         |
| Phenylalanine        | 0.994                    | 0.03                         |
| Lysine hydrochloride | 0.994                    | 0.02                         |
| Histidine            | 0.995                    | 0.04                         |
| Arginine             | 0.992                    | 0.03                         |
| Proline              | 0.995                    | 0.02                         |

## Uncertainty Evaluation

Firstly, the uncertainty of mass fraction of [Glu<sup>1</sup>]-fibrinopeptide B determined by GC-IDMS without impurity correction was evaluated and shown in Table S2.

**Table S2 Uncertainty evaluation of [Glu<sup>1</sup>]-fibrinopeptide B mass fraction determined by GC-IDMS (g/g)**

| Uncertainty<br>source                             | Uncertainty<br>$u_i$ | Sensitivity factor<br>$c_i$ | $c_i \times u_i$ |
|---------------------------------------------------|----------------------|-----------------------------|------------------|
| Weighing of Val CRM                               | 5.77E-07             | 64.3997                     | 3.72E-05         |
| Weighing of Phe CRM                               | 5.77E-07             | 42.5346                     | 2.46E-05         |
| Val purity                                        | 0.003                | 0.3625                      | 0.0010875        |
| Phe purity                                        | 0.002                | 0.3732                      | 0.0007464        |
| Weighing of 0.1 mol/L HCl for Val dissolving      | 5.77E-06             | -0.0647                     | -3.73E-07        |
| Weighing of 0.1 mol/L HCl for Phe dissolving      | 5.77E-06             | -0.0426                     | -2.46E-07        |
| Weighing of Val stock solution                    | 5.77E-06             | 0.5759                      | 3.32E-06         |
| Weighing of Phe stock solution                    | 5.77E-06             | 0.1167                      | 6.74E-07         |
| Weighing of 0.1 mol/L HCl for AA working solution | 5.77E-06             | -0.1493                     | -8.61984E-07     |

|                                                           |          |          |             |
|-----------------------------------------------------------|----------|----------|-------------|
| Weighing of L-Val                                         | 5.77E-07 | 0.0000   | 0           |
| Weighing of L-Phe                                         | 5.77E-07 | 0.0000   | 0           |
| Weighing of 0.1<br>mol/L HCl for L-Val<br>dissolving      | 5.77E-06 | 0.0000   | 0           |
| Weighing of 0.1<br>mol/L HCl for L-Phe<br>dissolving      | 5.77E-06 | 0.0000   | 0           |
| Weighing of L-Val<br>stock solution                       | 5.77E-06 | 0.0000   | 0           |
| Weighing of L-Phe<br>stock solution                       | 5.77E-06 | 0.0000   | 0           |
| Weighing of 0.1<br>mol/L HCl for L-AA<br>working solution | 5.77E-06 | 0.0000   | 0           |
| Weighing of AA<br>working solution for<br>calibrator      | 5.77E-06 | 21.4966  | 1.24E-04    |
| Weighing of L-AA<br>working solution for<br>calibrator    | 5.77E-06 | -15.0507 | -8.69E-05   |
| Weighing of L-AA<br>working solution for<br>sample        | 5.77E-06 | 15.0817  | 8.70742E-05 |

|                                                                |             |           |              |
|----------------------------------------------------------------|-------------|-----------|--------------|
| Peak area ratio of Val<br>of calibrator                        | 0           | -0.4910   | 0            |
| Peak area ratio of Phe<br>of calibrator                        | 0           | -0.4400   | 0            |
| Peak area ratio of Val<br>of sample                            | 0           | 0.4928    | 0            |
| Peak area ratio of Phe<br>of sample                            | 0           | 0.4272    | 0            |
| Weighing of sample                                             | 5.77E-07    | -331.2639 | -1.91E-04    |
| Weighing of<br>0.1%TFA for sample<br>dissolving                | 5.77E-06    | 0.3292    | 1.90064E-06  |
| Weighing of sample<br>for hydrolysis                           | 5.77E-06    | -11.4235  | -6.59536E-05 |
| Molecular weight of<br>Val                                     | 0.0018544   | -0.0031   | -5.71155E-06 |
| Molecular weight of<br>Phe                                     | 0.002449245 | -0.0023   | -5.52795E-06 |
| Molecular weight of<br>[Glu <sup>1</sup> ]-fibrinopeptide<br>B | 0.00672     | 0.0005    | 3.1369E-06   |
| Number of Val in<br>[Glu <sup>1</sup> ]-fibrinopeptide<br>B    | 0           | -0.3604   | 0            |

|                                                       |          |         |             |
|-------------------------------------------------------|----------|---------|-------------|
| Number of Phe in [Glu <sup>1</sup> ]-fibrinopeptide B | 0        | -0.1862 | 0           |
| Method repeatability                                  | 1.17E-03 | 1.0000  | 1.17E-03    |
| Variation between Val and Phe                         | 5.58E-03 | 1.0000  | 5.58E-03    |
| Combined standard uncertainty ( $u_x$ )               |          |         | 0.005861639 |

---

The [Glu<sup>1</sup>]-fibrinopeptide B purity is calculated by formula S.1:

$$c = xP \quad \text{S.1}$$

where,

$c$ — [Glu<sup>1</sup>]-fibrinopeptide B purity, g/g

$x$ — mass fraction of [Glu<sup>1</sup>]-fibrinopeptide B, g/g

$P$ — relative peak area ratio of [Glu<sup>1</sup>]-fibrinopeptide B in total peaks determined by LC-UV.

Therefore, the uncertainty of  $c$  can be estimated by formula (S.2):

$$\frac{u_c}{c} = \sqrt{\left(\frac{u_P}{P}\right)^2 + \left(\frac{u_x}{x}\right)^2} \quad \text{S.2}$$

$$u_c = c \sqrt{\left(\frac{u_P}{P}\right)^2 + \left(\frac{u_x}{x}\right)^2} \quad \text{S.3}$$

$$= 0.715 \times \sqrt{\left(\frac{0.1016}{96.77}\right)^2 + \left(\frac{0.0059}{0.739}\right)^2} = 0.00576$$

$$U = ku_c = 2 \times 0.00576 = 0.012 \text{ g/g}$$

S.4

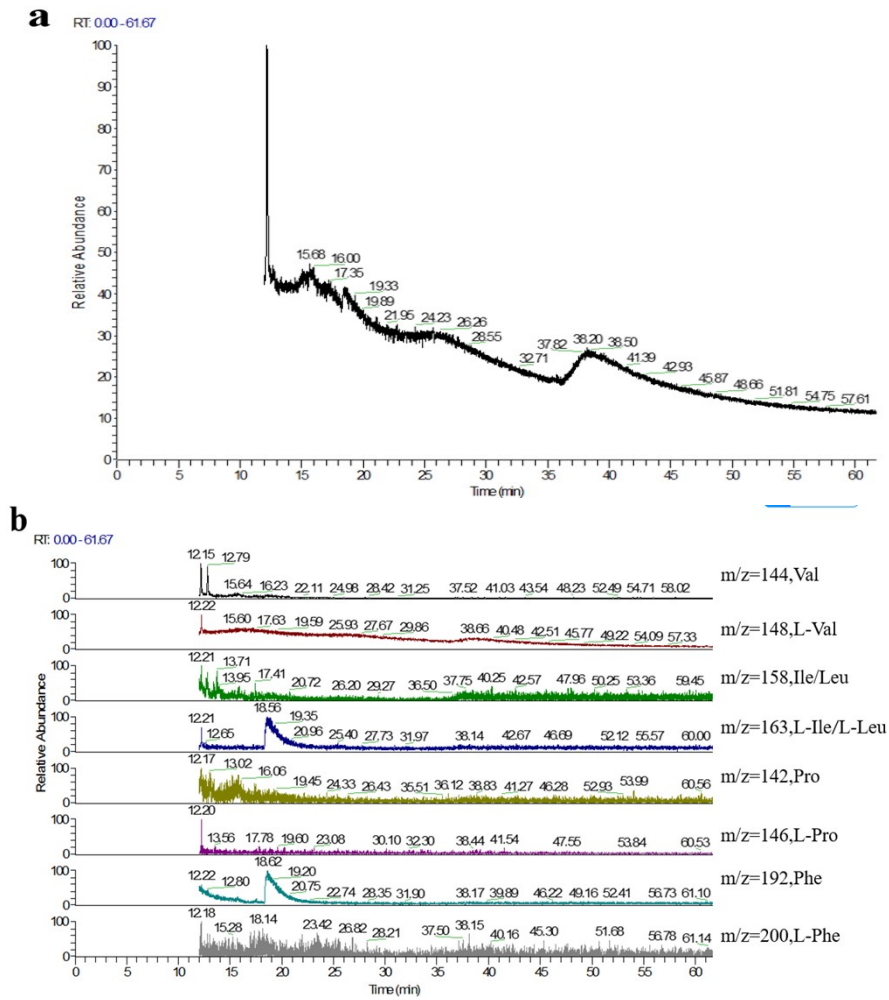

Figure S1 GC-MS chromatogram of blank

(a is the TIC and b is the EIC for 5 amino acids with their isotopic analogues)

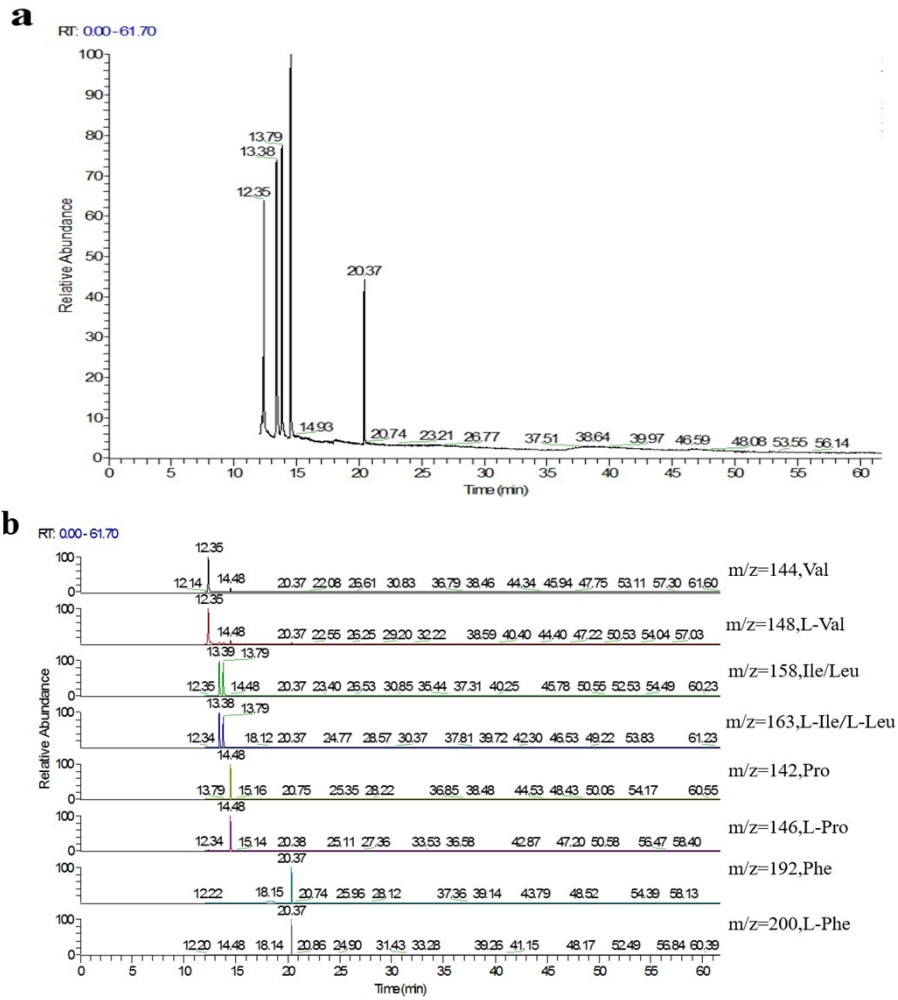

Figure S2 GC-MS chromatogram of amino acid calibration blend

(a is the TIC of amino acid calibration blend, b is the EIC of 5 amino acids with their isotopic analogues)
